# Supplementary material for: Redispersion mechanisms of 2D nanosheets: combined role of intersheet contact and surface chemistry
Source: Royal Society of Chemistry journal article supplement (doi:10.1039/d2nr05471j), 2022-12-27
Supplement: d2nr05471j1.pdf [file d2nr05471j1.pdf]

*Supporting Information for*

**Redispersion Mechanisms of 2D Nanosheets: Combined  
Role of Intersheet Contact and Surface Chemistry**

Bei Liu<sup>a#</sup>, Jingyan Zhang<sup>b,c#</sup>, Qi Han<sup>a</sup>, Yufei Shu<sup>a</sup>, Li Wang<sup>a</sup>, Hui Li<sup>c</sup>, Lei  
Li<sup>b\*</sup>, Zhongying Wang<sup>a\*</sup>

<sup>a</sup> School of Environmental Science and Engineering  
Southern University of Science and Technology  
Shenzhen 518055, China

<sup>b</sup> Department of Material Science and Engineering  
Southern University of Science and Technology  
Shenzhen 518055, China

<sup>c</sup> Beijing Advanced Innovation Center for Soft Matter Science and Engineering  
Beijing University of Chemical Technology  
Beijing 100029, China

---

\* The author to whom correspondence should be addressed. e-mail: [wangzy6@sustech.edu.cn](mailto:wangzy6@sustech.edu.cn); [lil33@sustech.edu.cn](mailto:lil33@sustech.edu.cn); # These authors contributed equally to this work.

## Table of content

|                                                                                                                                                         |           |
|---------------------------------------------------------------------------------------------------------------------------------------------------------|-----------|
| <b>Supplementary Experimental Section</b> .....                                                                                                         | <b>2</b>  |
| <b>Evaluation of Hamaker Constants</b> .....                                                                                                            | <b>2</b>  |
| <b>Supplementary Results</b> .....                                                                                                                      | <b>4</b>  |
| <b>Figure S1.</b> Characterization of MoS <sub>2</sub> and GO nanosheets .....                                                                          | <b>4</b>  |
| <b>Figure S2.</b> Schematic illustration for the creation and the redispersion of random aggregates and aligned stacks .....                            | <b>4</b>  |
| <b>Figure S3.</b> Rising hydrodynamic diameter of MoS <sub>2</sub> dispersion at pH 3 .....                                                             | <b>5</b>  |
| <b>Figure S4.</b> Aggregation of GO dispersion .....                                                                                                    | <b>5</b>  |
| <b>Figure S5.</b> Evolution of the normalized suspended concentration of MoS <sub>2</sub> and GO in the solution containing 2 mM Ca <sup>2+</sup> ..... | <b>6</b>  |
| <b>Figure S6.</b> SEM characterization of aligned stacks and aggregates of GO .....                                                                     | <b>6</b>  |
| <b>Figure S7.</b> Linear correlation of the absorbance to the concentration of nanosheets .....                                                         | <b>6</b>  |
| <b>Figure S8.</b> Photographs of the original dispersion and redispersion .....                                                                         | <b>7</b>  |
| <b>Figure S9.</b> Redispersion from MoS <sub>2</sub> stacks as a function of thickness .....                                                            | <b>7</b>  |
| <b>Figure S10.</b> XPS spectra and deconvolution results of MoS <sub>2</sub> , GO and their derivatives .....                                           | <b>8</b>  |
| <b>Figure S11.</b> Characterization of GO and rGO obtained through chemical reduction .....                                                             | <b>8</b>  |
| <b>Figure S12.</b> SMD simulation results of system at $k_{\text{spring}} = 2500 \text{ kcal/mol/\AA}^2$ .....                                          | <b>9</b>  |
| <b>Figure S13.</b> Snapshot of an MD simulation used to compute the PMFs .....                                                                          | <b>9</b>  |
| <b>Figure S14.</b> XRD patterns of as-created (wet) MoS <sub>2</sub> stacks from SL-pristine and SL-200 ...                                             | <b>10</b> |
| <b>Figure S15.</b> PMF as a function of interlayer spacing for 1T MoS <sub>2</sub> with various tilt angles ..                                          | <b>10</b> |
| <b>Figure S16.</b> Redispersion PMF profiles of MoS <sub>2</sub> tilted at the Mo end .....                                                             | <b>11</b> |
| <b>Table S1.</b> Water contact angle and Hamaker constant of nanosheets .....                                                                           | <b>12</b> |
| <b>Movie S1.</b> MD simulation of the PMF for two parallel nanosheets of 1T MoS <sub>2</sub> .                                                          |           |
| <b>Movie S2.</b> MD simulation of the PMF for two parallel nanosheets 2H MoS <sub>2</sub> .                                                             |           |
| <b>Movie S3.</b> MD simulation of the PMF for 1T MoS <sub>2</sub> with tilt angle of 3°.                                                                |           |
| <b>Movie S4.</b> MD simulation of the PMF for 2H MoS <sub>2</sub> with tilt angle of 3°.                                                                |           |
| <b>References</b> .....                                                                                                                                 | <b>13</b> |

## 1. Supplementary Experimental Section

**Evaluation of Hamaker Constants.** To evaluate the vdW forces between nanosheets of pristine and transformed GO and MoS<sub>2</sub>, the Hamaker constants in water were evaluated. Based on the Lifshitz theory for dispersion forces, the Hamaker constant between two semi-infinite media across a medium (water) can be estimated as follows:

$$H_{total} \approx \frac{3hv_e}{8\sqrt{2}} \times \frac{(n_1^2 - n_3^2)(n_2^2 - n_3^2)}{\sqrt{n_1^2 + n_3^2} \times \sqrt{n_2^2 + n_3^2} \times (\sqrt{n_1^2 + n_3^2} + \sqrt{n_2^2 + n_3^2})}$$

where  $n_1 = n_2 = n$  is the refractive index of interacting nanosheets in visible regime,  $n_3$  is the refractive index of water (1.33),  $h$  is the Planck constant ( $6.626 \times 10^{-34}$  Js), and  $v_e$  is the main absorption frequency in the UV region, which could be obtained through the following equation:

$$v_e = v_I \sqrt{3/(n^2 + 2)}$$

where  $v_I$  is the absorption frequency of a Bohr atom ( $3.3 \times 10^{15}$  s<sup>-1</sup>).

To the best of our knowledge, there's no data available for the refractive index  $n$  of GO, MoS<sub>2</sub> nanosheets and transformed ones. However, it was reported the average  $n$  of GO and rGO in visible regime are around 1.85 and 2.6, respectively;<sup>1,2</sup> and the average  $n$  of monolayer 1T MoS<sub>2</sub> and 2H MoS<sub>2</sub> are around 2.5 and 4.0, respectively.<sup>3,4</sup> Therefore, the  $H$  for GO and rGO in water is thus between 49 and  $260 \times 10^{-21}$  J, and  $H$  of 1T-MoS<sub>2</sub> and 2H-MoS<sub>2</sub> is between 154 and  $320 \times 10^{-21}$  J. A linear increase of  $H$  was assumed during reduction of GO and phase transformation of MoS<sub>2</sub>.

**First-principles calculations.** First-principles calculations were performed in the framework of the density functional theory (DFT) method as implemented in the Vienna Ab Initio Simulation Package (VASP).<sup>5,6</sup> The project-augmented-wave (PAW) method<sup>7,8</sup> with plane wave basis sets were employed to treat the core-electron interaction. The generalized gradient approximation (GGA) in the Perdew-Burke-Ernzerhof (PBE)<sup>9</sup> form was applied to describe the exchange and correlation energy.

The energy cutoff was 400 eV. The Monkhorst-Pack scheme with a  $1 \times 1 \times 1$  k-point grid was adopted to sample the Brillouin zone.<sup>10</sup> All the atomic structures were relaxed until the force was below 0.05 eV/Å. A model consisting of two  $35 \times 39$  Å<sup>2</sup> MoS<sub>2</sub> nanoribbons with a tilt angle was used to model the variation of the system energy with the interlayer distance (see Figure S16d). A  $\sim 15$  Å vacuum layer was used to avoid interaction from neighboring cells in both the  $x$  and  $z$  directions.

## 2. Supplementary Results

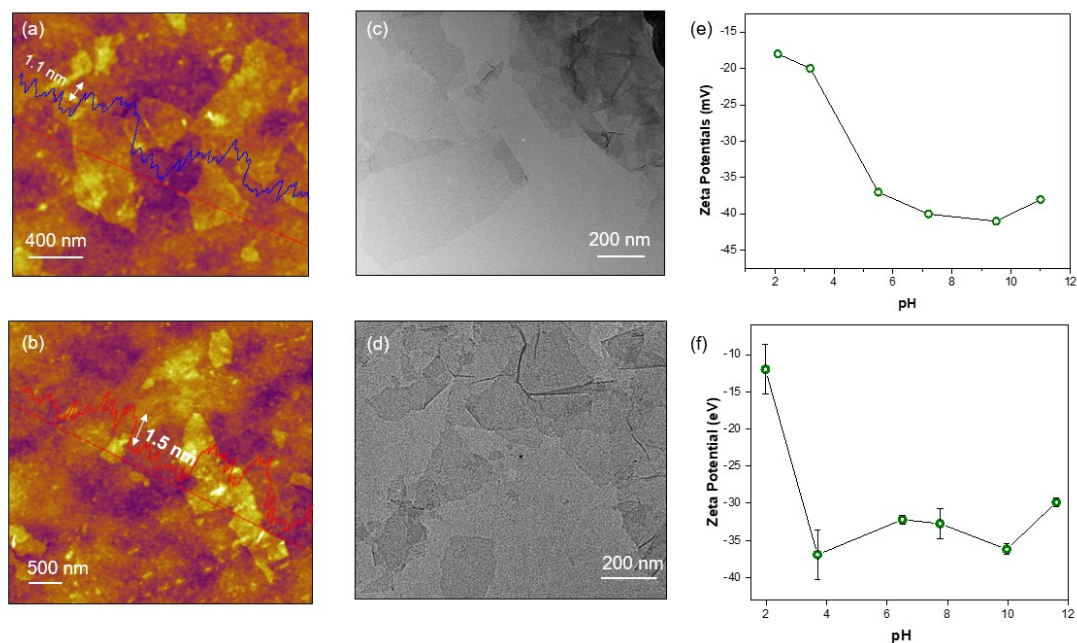

**Figure S1.** Characterization of MoS<sub>2</sub> (a, c, e) and GO (b, d, f) nanosheets: (a-b) representative AFM image, inset: line scan showing the thickness profile along the red line in the image; (c-d) representative TEM image; (e-f) apparent  $\zeta$  potentials as a function of pH.

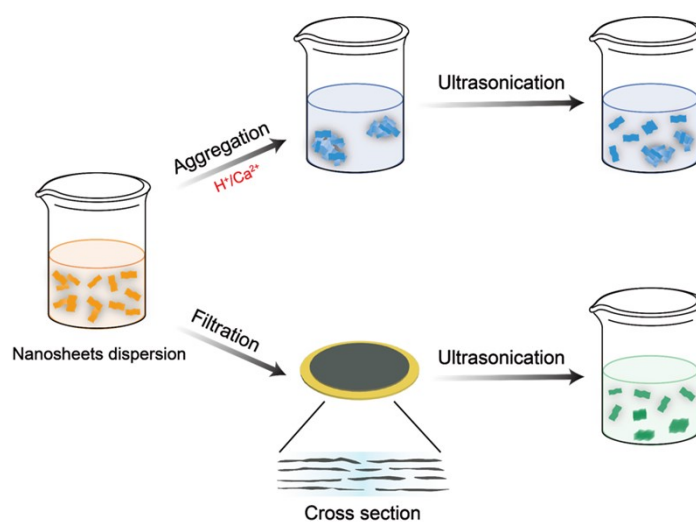

**Figure S2.** Schematic illustration for the creation and the redispersion of random aggregates and aligned stacks.

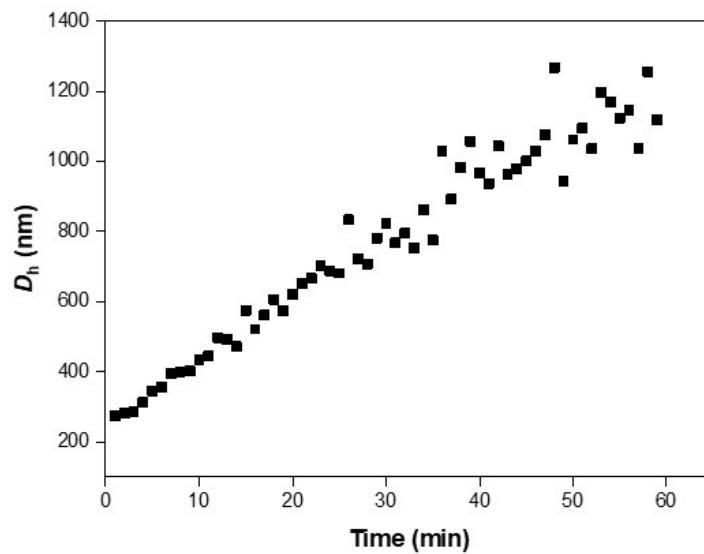

**Figure S3.** Rising hydrodynamic diameter of MoS<sub>2</sub> dispersion at pH 3. The results suggested that a low pH could induce the aggregation of the nanosheets and thus destroy the colloidal stability by providing adequate H<sup>+</sup>.

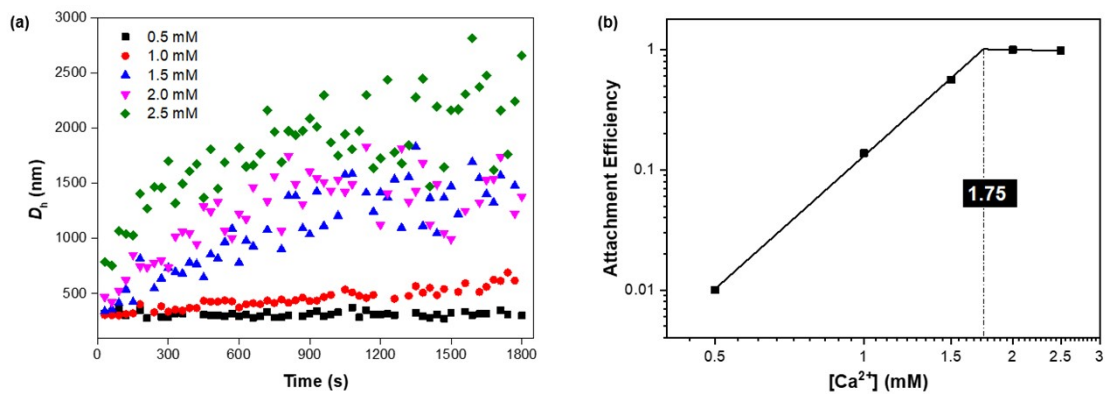

**Figure S4.** Aggregation of GO dispersion: (a) evolution of hydrodynamic diameter of GO in the solutions containing a series of concentrations of Ca<sup>2+</sup>; (b) attachment efficiency as a function of Ca<sup>2+</sup> concentrations, from which the critical coagulation concentration (CCC) of 1.75 mM was obtained. Therefore, a concentration of 2 mM Ca<sup>2+</sup> was employed in the study to induce the nanosheets aggregation, which is higher than CCCs of Ca<sup>2+</sup> for GO (1.75 mM) and MoS<sub>2</sub> (0.9 mM).<sup>11</sup>

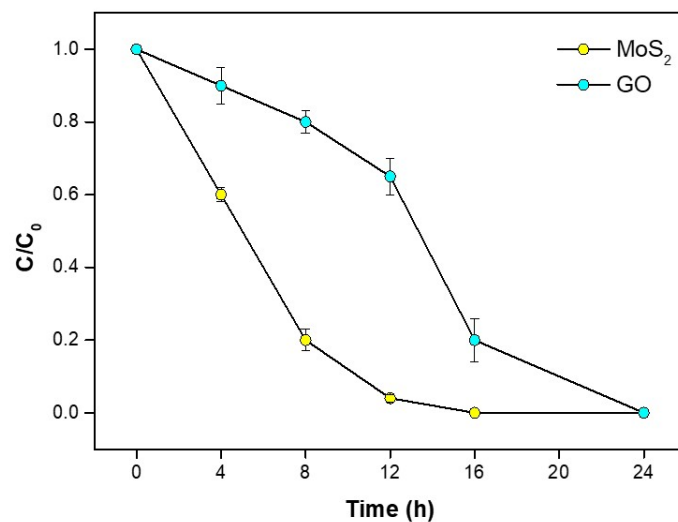

**Figure S5.** Evolution of the normalized suspended concentration of MoS<sub>2</sub> and GO in the solution containing 2 mM Ca<sup>2+</sup>.

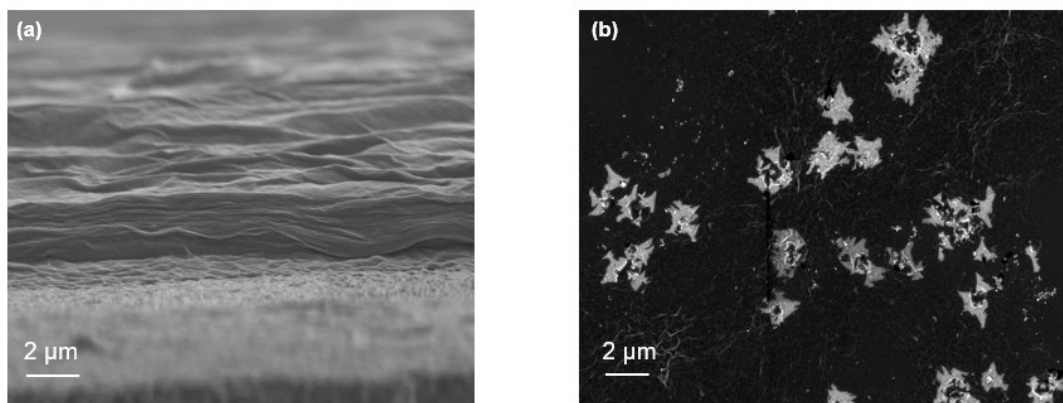

**Figure S6.** SEM characterization of aligned stacks and aggregates of GO: (a) cross-section image of GO stacks obtained by filtration and (b) top view of GO aggregates.

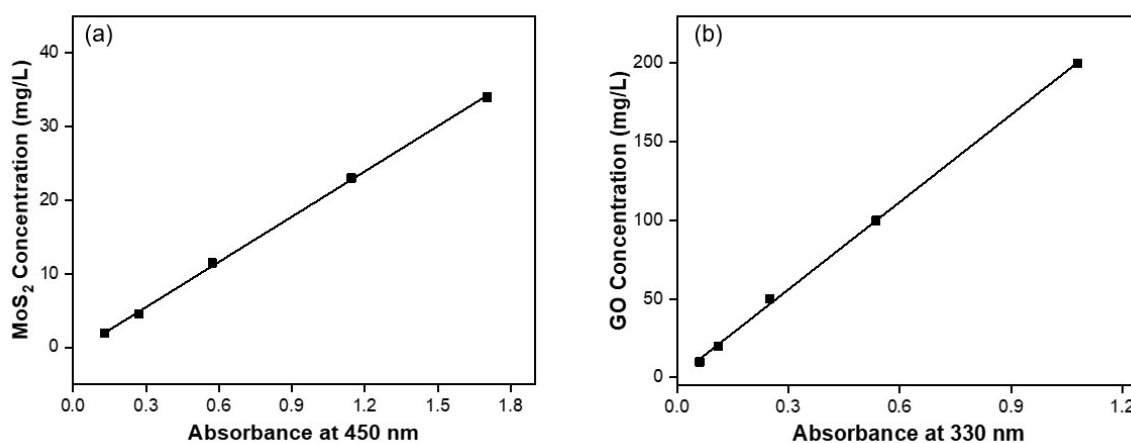

**Figure S7.** Linear correlation of the absorbance to the concentration of nanosheets dispersion: (a) SL-MoS<sub>2</sub> at 450 nm and (b) GO at 330 nm.

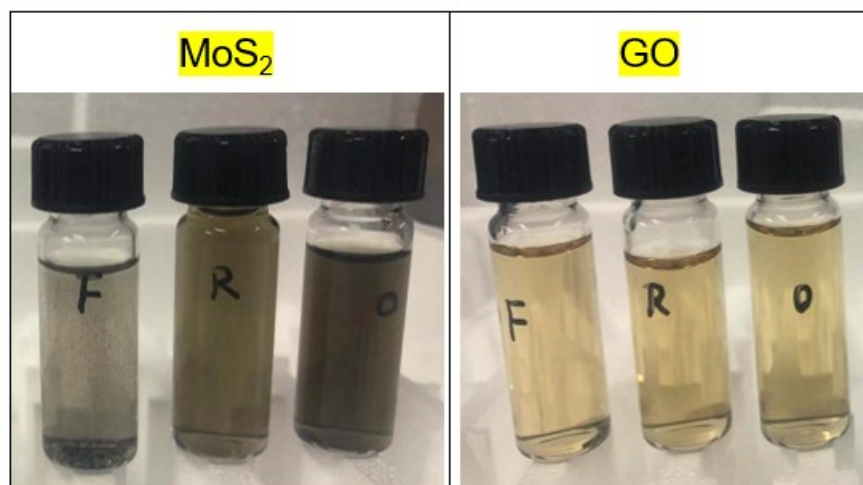

**Figure S8.** Photographs of the original dispersion and redispersion obtained from the random aggregates and aligned stacks. Left: MoS<sub>2</sub>; right: GO (F: redispersion of stacks created by filtration; R: redispersion from random aggregates; O: original dispersion).

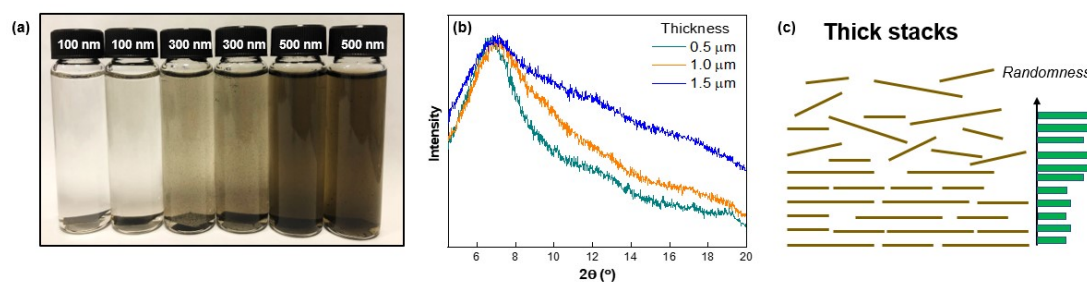

**Figure S9.** Redispersion from MoS<sub>2</sub> stacks as a function of thickness: (a) images of redispersion, with redispersion efficiency of 1%, 29% and 54% from the stacks with thickness of 100, 300 and 500 nm, respectively; (b) XRD patterns, showing a broadening peak as the increase of thickness; (c) schematic illustration of randomness as influenced by the thickness of MoS<sub>2</sub> stacks.



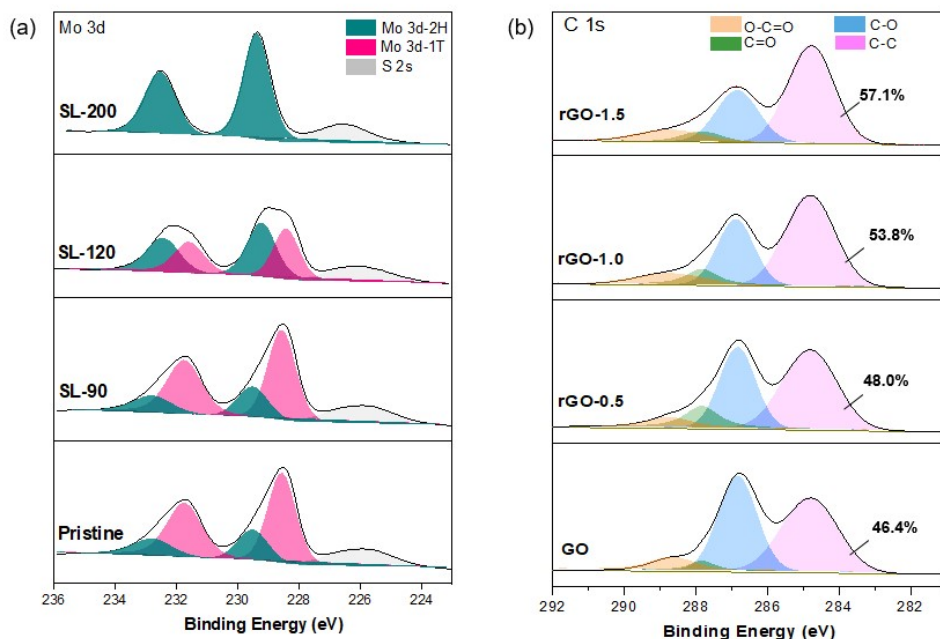

**Figure S10.** XPS characterizations on the composition deconvolution of MoS<sub>2</sub> and GO during transformation: (a) Mo 3d of MoS<sub>2</sub> nanosheets, showing the increasing fraction of 2H phase during hydrothermal treatment, and (b) C 1s of GO during the reduction reaction, suggesting the restoration of C–C/C=C during reaction.

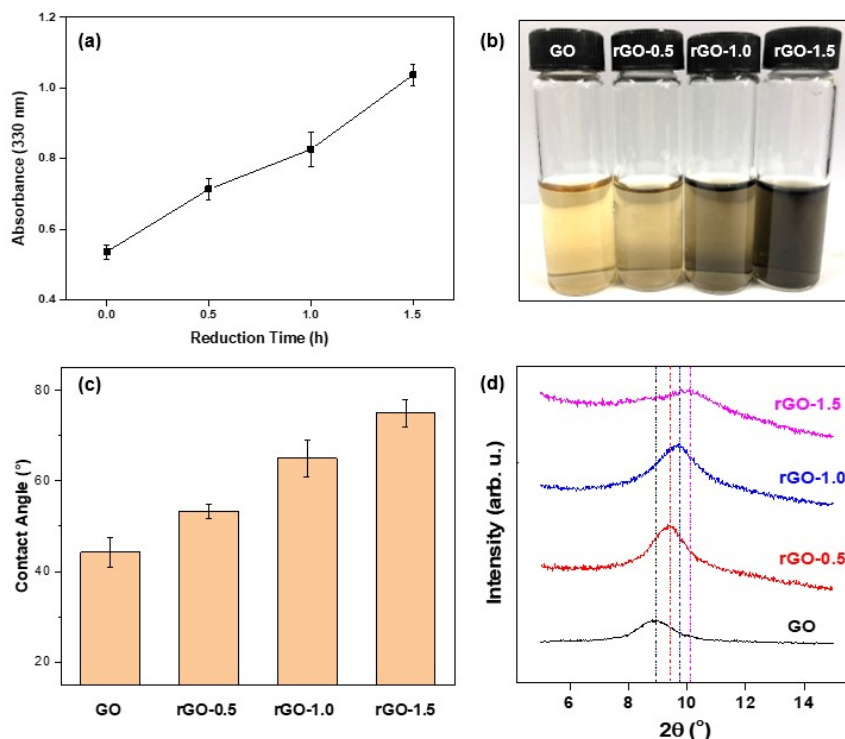

**Figure S11.** Characterization of GO and rGO obtained through chemical reduction: (a) absorbance at 330 nm in the concentration of 100 mg/L; (b) photograph of the dispersion (100 mg/L); (c) water contact angles and (d) XRD patterns of restacked GO and rGO.

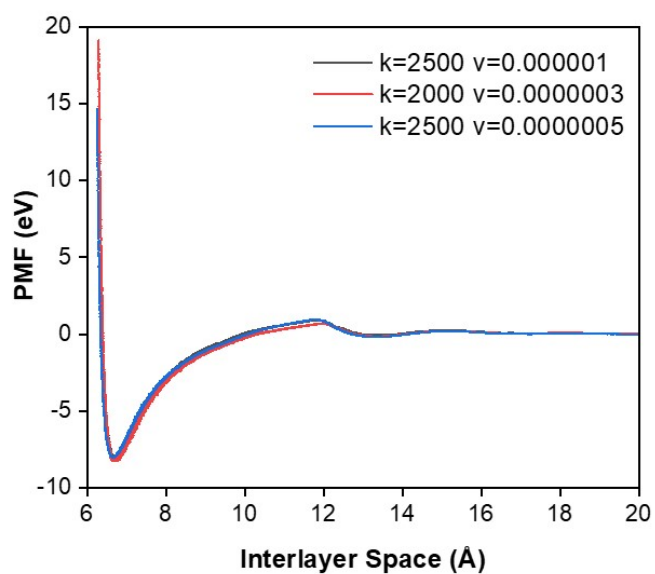

**Figure S12.** SMD simulation results of system at  $k_{\text{spring}} = 2500 \text{ kcal/mol/\AA}^2$  with various pulling speed from 0.0000005 to 0.000001  $\text{\AA}/\text{fs}$ .

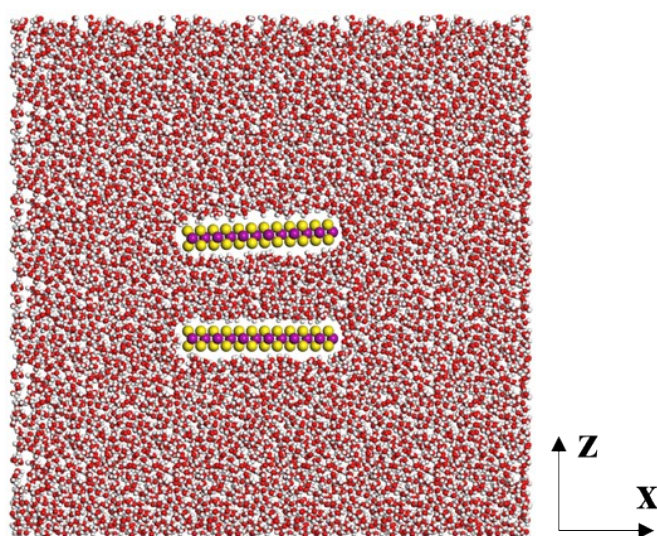

**Figure S13.** Snapshot of an MD simulation used to compute the PMFs showing the full extent of the simulation box in the x- and z-directions.

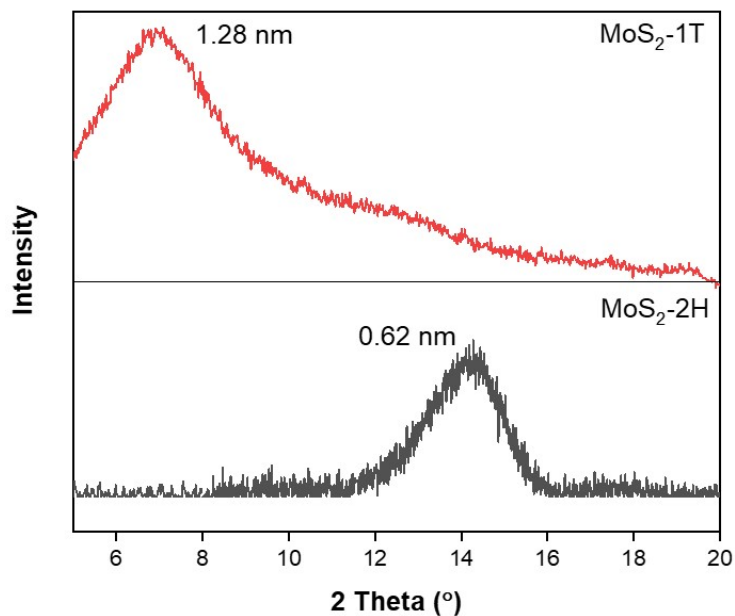

**Figure S14.** XRD patterns of as-created (wet) MoS<sub>2</sub> stacks from SL-pristine dominant in 1T phase and SL-200 in pure 2H phase, with the interlayer spacing of 1.28 and 0.62 nm identified, respectively.

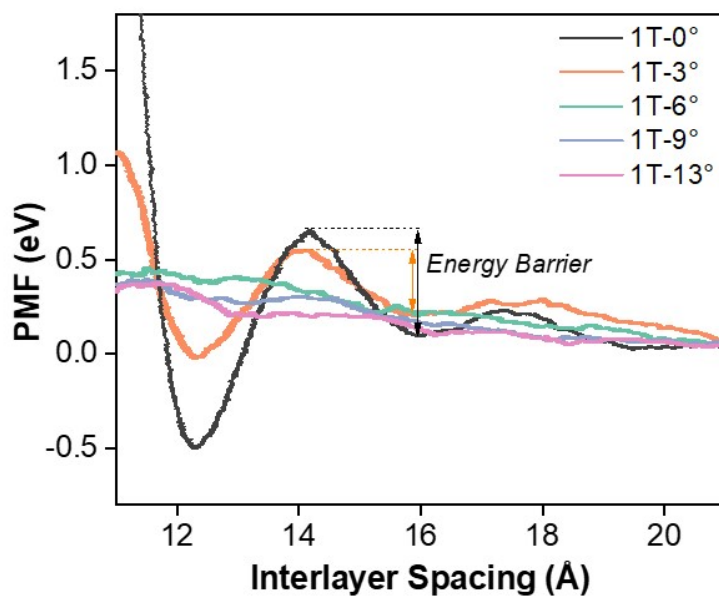

**Figure S15.** PMF as a function of interlayer spacing for 1T phase of MoS<sub>2</sub> with various tilt angles. The simulated models are built with S atoms being exposed outside.

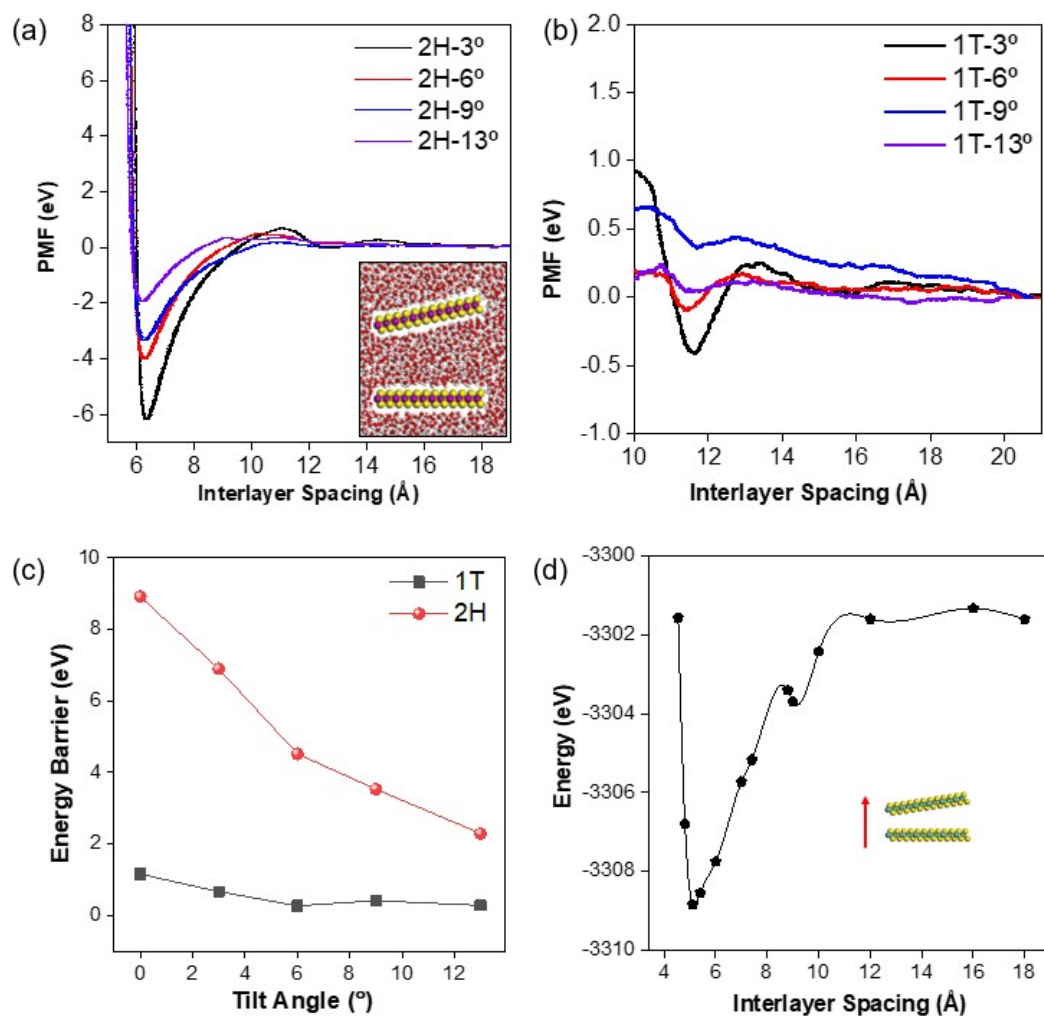

**Figure S16.** PMF calculations for 1T and 2H MoS<sub>2</sub> tilted at the Mo end: (a-b) the PMF profiles of 2H (a) and 1T (b) MoS<sub>2</sub> at various tilt angles (inset: the schematic illustration of the tilt model of two MoS<sub>2</sub> layers in water solution); (c) the redispersion barrier of 1T and 2H MoS<sub>2</sub> changes with the tilt angle; and (d) the total energy of the tilted 1T MoS<sub>2</sub> in vacuum (tilt angle=9°) changes with interlayer spacing based on first-principles calculations.

**Table S1** Water contact angle and Hamaker constant of nanosheets

| <b>Nanosheets</b>          | <b>Hamaker constant (<math>\times 10^{-21}</math> J)</b> | <b>Water contact angle (<math>^{\circ}</math>)</b> |
|----------------------------|----------------------------------------------------------|----------------------------------------------------|
| <b>GO</b>                  | 49                                                       | 45                                                 |
| <b>rGO-0.5</b>             | 62                                                       | 53.3                                               |
| <b>rGO-1.0</b>             | 108                                                      | 69                                                 |
| <b>rGO-1.5</b>             | 135                                                      | 88                                                 |
| <b>MoS<sub>2</sub></b>     | 154                                                      | 58                                                 |
| <b>MoS<sub>2</sub>-90</b>  | 159                                                      | 60                                                 |
| <b>MoS<sub>2</sub>-120</b> | 218                                                      | 72                                                 |
| <b>MoS<sub>2</sub>-200</b> | 320                                                      | 98                                                 |
| <b>WS<sub>2</sub></b>      | 320 <sup>12</sup>                                        | 78 <sup>13</sup>                                   |
| <b>h-BN</b>                | 764 <sup>12</sup>                                        | 81 <sup>14</sup>                                   |
| <b>MXene</b>               | 48.7 <sup>15</sup>                                       | 24.8 <sup>16</sup>                                 |
| <b>AlMg-LDH</b>            | 14 <sup>17</sup>                                         | 21.4 <sup>18</sup>                                 |

## References

- 1 M. M. Gudarzi, *Langmuir*, 2016, **32**, 5058–5068.
- 2 I. Jung, M. Vaupel, M. Pelton, R. Pinery, D. A. Dikin, S. Stankovich, J. An and R. S. Ruoff, *J. Phys. Chem. C*, 2008, **112**, 8499–8506.
- 3 X. Yin, C. S. Tang, D. Wu, W. Kong, C. Li, Q. Wang, L. Cao, M. Yang, Y. H. Chang, D. Qi, F. Ouyang, S. J. Pennycook, Y. P. Feng, M. B. H. Breese, S. J. Wang, W. Zhang, A. Rusydi and A. T. S. Wee, *Adv. Sci.*, , DOI:10.1002/advs.201802093.
- 4 H. Zhang, Y. Ma, Y. Wan, X. Rong, Z. Xie, W. Wang and L. Dai, *Sci. Rep.*, 2015, **5**, 1–7.
- 5 G. Kresse and J. Furthmüller, *Comput. Mater. Sci.*, 1996, **6**, 15–50.
- 6 G. Kresse and J. Furthmüller, *Phys. Rev. B - Condens. Matter Mater. Phys.*, 1996, **54**, 11169–11186.
- 7 P. E. Blöchl, *Phys. Rev. B*, 1994, **50**, 17953–17979.
- 8 G. Kresse and D. Joubert, *Phys. Rev. B - Condens. Matter Mater. Phys.*, 1999, **59**, 1758–1775.
- 9 J. P. Perdew, K. Burke and M. Ernzerhof, *Phys. Rev. Lett.*, 1996, **77**, 3865–3868.
- 10 H. J. Monkhorst and J. D. Pack, *Phys. Rev. B*, 1976, **13**, 5188–5192.
- 11 B. Liu, Q. Han, L. Li, S. Zheng, Y. Shu, J. A. Pedersen and Z. Wang, *Environ. Sci. Technol.*, 2021, **55**, 16379–16389.
- 12 T. M. Mohona, A. Gupta, A. Masud, S. C. Chien, L. C. Lin, P. C. Nalam and N. Aich, *Environ. Sci. Technol.*, 2019, **53**, 4161–4172.
- 13 P. K. Chow, E. Singh, B. C. Viana, J. Gao, J. Luo, J. Li, Z. Lin, A. L. Elías, Y. Shi, Z. Wang, M. Terrones and N. Koratkar, *ACS Nano*, 2015, **9**, 3023–3031.
- 14 A. Govind Rajan, M. S. Strano and D. Blankschtein, *Nano Lett.*, 2019, **19**, 1539–1551.
- 15 J. Lao, R. Lv, J. Gao, A. Wang, J. Wu and J. Luo, *ACS Nano*, 2018, **12**, 12464–12471.
- 16 S. Shen, T. Ke, K. Rajavel, K. Yang and D. Lin, *Small*, 2020, **16**, 2002433.
- 17 D. Takács, B. Katana, A. Szerlauth, D. Sebők, M. Tomšič and I. Szilágyi, *Soft Matter*, 2021, **17**, 9116–9124.
- 18 X. Han, J. Hu, Y. Q. Wang, T. B. Xiao, W. Xia, Y. N. Chen and L. Wu, *Front. Mater.*, 2021, **8**, 1–12.
